# Supplementary material for: Programmability of dual-color DNA-templated silver nanoclusters for modular design of FRET aptasensors toward multiplexed detection
Source: Royal Society of Chemistry journal article supplement (doi:10.1039/d4cc03405h), 2024-01-01
Supplement: d4cc03405h1.pdf [file d4cc03405h1.pdf]

## Electronic Supplementary Information

### **Programmability of dual-color DNA-templated silver nanoclusters for modular design of FRET aptasensors toward multiplexed detection**

Mustafa Hussain,<sup>a</sup> Yue Liu,<sup>a</sup> Chengquan Wang,<sup>b,\*</sup> Huiyuan Yang,<sup>a</sup> Kawtar Ettayri,<sup>a</sup> Yu Chen,<sup>a</sup> Kun Wang,<sup>a,\*</sup> Lingliang Long<sup>a</sup> and Jing Qian<sup>a,\*</sup>

<sup>a</sup>. *School of Chemistry and Chemical Engineering, Jiangsu University, Zhenjiang 212013, P.R. China*

<sup>b</sup>. *School of Food and Biological Engineering, Jiangsu University, Zhenjiang 212013, P.R. China.*

\*Corresponding author: E-mail: wangcq@ujs.edu.cn (C.Q. Wang); wangkun@ujs.edu.cn (K. Wang); qianj@ujs.edu.cn (J. Qian)

## List of Contents

|                                                                             |      |
|-----------------------------------------------------------------------------|------|
| Materials .....                                                             | S-3  |
| Instruments .....                                                           | S-3  |
| Preparation of MoS <sub>2</sub> nanosheets.....                             | S-3  |
| Design of DNA templates for AgNCs synthesis.....                            | S-3  |
| Synthesis of AgNCs-DNA1 and AgNCs-DNA2.....                                 | S-4  |
| Conjugation of AgNCs-DNA with aptamer.....                                  | S-4  |
| Construction of the FRET aptasensor and detection procedure.....            | S-4  |
| Repeatability, long-term stability, and practicality of the aptasensor..... | S-5  |
| Fig. S1.....                                                                | S-6  |
| Fig. S2.....                                                                | S-7  |
| Fig. S3.....                                                                | S-8  |
| Fig. S4.....                                                                | S-9  |
| Fig. S5.....                                                                | S-10 |
| Fig. S6.....                                                                | S-11 |
| Fig. S7.....                                                                | S-12 |
| Fig. S8.....                                                                | S-13 |
| Table S1.....                                                               | S-14 |
| Table S2.....                                                               | S-15 |
| Table S3.....                                                               | S-16 |
| Notes and references .....                                                  | S-17 |

**Materials.** AgNO<sub>3</sub> and other chemicals were obtained from Sinopharm Chemical Reagent Co., Ltd. (China). We obtained AFB1 and OTA from Sigma-Aldrich (USA). The DNA oligonucleotides sequences names as DNA1 and DNA2 (Table 1) were synthesized by Sangon Biotech Co., Ltd (Shanghai, China). The aptamers possessing sequences against AFB1 (Apt1), OTA (Apt2), prostate-specific antigen (Apt3), carcinoembryonic antigen (Apt 4) (Table S1) were synthesized by Sangon Biotech Co., Ltd (Shanghai, China). Aflatoxin B1 (AFB1), fumonisin B1 (FB1), zearalenone (ZEN), glucose, bovine serum albumin (BSA), vitamin B2, KCl, CaCl<sub>2</sub>, and MgSO<sub>4</sub> were obtained from Aladdin reagent Co., Ltd. Ochratoxin A (OTA) and deoxynivalenol (DON) were purchased from Cato Research Chemicals Inc. Aflatoxin B2 (AFB2) was obtained from Sigma-Aldrich. 10 mM PBS (pH 7.4) and Tris-HCl buffer (pH 7.4, containing 50 mM Tris-HCl and 1.0 mM EDTA) were used for aptasensor fabrication and detection procedure. We used deionized and ultrapure water to conduct all experiments.

**Instruments.** There are various kind of characterization tools available that were used as evidence for the completion of reactions and to check property of their AgNCs-DNA. UV-vis absorption spectra were studied using a UV-2450 spectrophotometer (Shimadzu, Japan). Fluorescence spectra were recorded using a Hitachi F-4500 fluorescence spectrophotometer (Tokyo, Japan). Transmission electron microscopy (TEM, JEOL 2100, Japan) was used for morphology analysis of the specimens. X-ray photoelectron spectroscopy (XPS) was taken on a multi-technique surface analysis system (Thermo Electron Co., USA).

**Preparation of MoS<sub>2</sub> nanosheets.** A modified liquid exfoliation method with a little modification were used to prepare MoS<sub>2</sub> nanosheets.<sup>1</sup> Firstly, MoS<sub>2</sub> powder (300 mg) was added to a mixture of ethanol and water (45% v/v) in a flask (250 mL), which was sonicated for 24 h to produce a dark green suspension. We collected the supernatant after centrifuging at 6000 rpm for 20 min. The collected supernatant was further centrifugated at 12000 rpm for 30 min and the precipitation was baked at 70 °C in oven. Finally, the as-prepared MoS<sub>2</sub> nanosheets were dispersed in Tris-HCl buffer (10 mM, pH 7.4) for further use.

**Design of DNA templates for AgNCs synthesis.** Two DNA strands, designated as DNA1 and DNA2, were designed to incorporate a template region at the 5' terminus for AgNCs-DNA synthesis, along with a hybridization region tailored at the 3' terminus to facilitate aptamer capture (Table S1). This hybridization segment comprises five guanine sequences (-GGGGG, G5)

specifically designed to promote aptamer binding. In parallel, Apt1 or Apt2 were designed to integrate with the AgNCs-DNA signal tags through five cytosine sequences (-CCCCC, C5) positioned at their 3' ends (Table S1). This design ensured the efficient synthesis of AgNCs-DNA probes and their subsequent hybridization with the respective aptamers.

**Synthesis of AgNCs-DNA1 and AgNCs-DNA2.** Initially, a 100  $\mu\text{M}$  DNA1 solution was centrifuged at 10,000 rpm for 5 min and then diluted to 75  $\mu\text{L}$  using PBS buffer (10 mM, pH 7.4). This solution was heated in a water bath at 90  $^{\circ}\text{C}$  for 1 h and subsequently cooled to room temperature. Afterwards, 10  $\mu\text{L}$  of 1.5 mM  $\text{AgNO}_3$  and 30  $\mu\text{L}$  of PBS buffer (10 mM, pH 7.4) were added to 100  $\mu\text{L}$  of the pretreated DNA1 solution, followed by vigorously stirring at room temperature for 1 h. Thereafter, 35  $\mu\text{L}$  of freshly prepared 1.5 mM  $\text{NaBH}_4$  was added, followed by incubation in the dark at 4.0  $^{\circ}\text{C}$  for 16 h to yield AgNCs-DNA1. A similar protocol was adhered to for the synthesis of the AgNCs-DNA2 probe, with the sole exception of replacing DNA1 with DNA2.

**Conjugation of AgNCs-DNA with aptamer.** To conjugate AgNCs-DNA1 with Apt1, resulting in AgNCs-DNA1/Apt1, we combined 100  $\mu\text{L}$  of Apt1 with 100  $\mu\text{L}$  of the obtained AgNCs-DNA1 solution. Following this, 300  $\mu\text{L}$  of TE buffer (consisting of 50 mM Tris-HCl and 1.0 mM EDTA at pH 7.4) was added, bringing the total volume to 500  $\mu\text{L}$ . This mixture was then shaken in the dark at room temperature for 2 h to promote hybridization between the G5 and C5 sequences. The resulting AgNCs-DNA1/Apt1 probes were subsequently stored at 4  $^{\circ}\text{C}$  for later use. Analogously, AgNCs-DNA2/Apt2 probes were prepared using the same methodology, substituting AgNCs-DNA2 and Apt2 as the fluorescence indicator and aptamer, respectively.

**Construction of the FRET aptasensor and detection procedure.** Initially, 200  $\mu\text{L}$  of AgNCs-DNA1/Apt1 and 200  $\mu\text{L}$  of AgNCs-DNA2/Apt2 were combined and vigorously shaken for 5 min at room temperature. Subsequently, 300  $\mu\text{L}$  of  $\text{MoS}_2$  nanosheets solution at 1.5  $\text{mg mL}^{-1}$  was introduced to quench the fluorescence of the AgNCs-DNA/Apt. After shaking for 7 min, the adsorption between the  $\text{MoS}_2$  nanosheets and the AgNCs-DNA/Apt probes led to a significant reduction in the fluorescence intensity of the probes. The resulting  $\text{MoS}_2@$ AgNCs-DNA/Apt was then diluted with TE buffer (pH 7.4) to a total volume of 800  $\mu\text{L}$ , forming the aptasensor. To detect the presence of AFB1 and OTA, 100  $\mu\text{L}$  aliquots of mycotoxin solutions, varying in concentration, were introduced into 400  $\mu\text{L}$  of the  $\text{MoS}_2@$ AgNCs-DNA/Apt suspension. This mixture was then

incubated at 37 °C for 50 min while being agitated. After the incubation period, the fluorescence spectrum of the solution was recorded using an excitation wavelength of 310 nm.

**Repeatability, long-term stability, and practicality of the aptasensor.** The aptasensor's repeatability was examined by conducting six consecutive fluorescent measurements by incubation it with AFB1 and OTA at a concentration of 1 ng mL<sup>-1</sup>. These parallel assessments yielded a low relative standard deviation (RSD) of 4.5%, demonstrating the aptasensor possessed good repeatability. Moreover, its long-term stability was further investigated by monitoring its fluorescence response upon weekly incubation with AFB1 and OTA (1 ng mL<sup>-1</sup> each). The experimental data revealed that, even after three weeks, the aptasensor retained 95.4% of its initial response for 1 ng mL<sup>-1</sup> AFB1 and 92.5% for 1 ng mL<sup>-1</sup> OTA, thereby exhibiting satisfactory long-term stability. To further investigate the potential practicality of the developed method, extensive testing was performed to evaluate the recovery percentages of AFB1 and OTA in spiked peanut samples. These samples were intentionally spiked with different concentrations of mycotoxins (0.5, 1, 5 ng mL<sup>-1</sup>). The recovery rates for AFB1 in the peanut samples ranged from 97.8% to 100.6% (RSD < 9.8%), while the recovery rates for OTA in peanut samples ranged from 97.4% to 106.7% (RSD < 8.2%). A detailed overview of these results is available in Table S3. These findings strongly indicated the suitability of the developed assay for the quantitative determination of AFB1 and OTA.

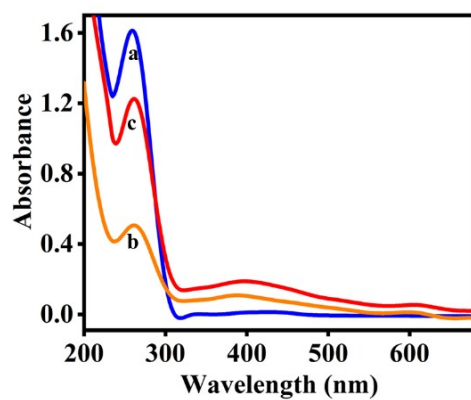

**Fig. S1** UV-vis absorption spectra of (a) free DNA2, (b) AgNCs-DNA2, and (c) AgNCs-DNA2/Apt2.

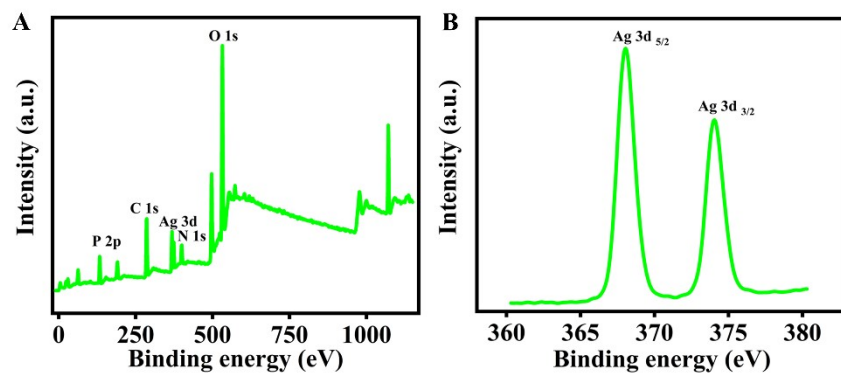

**Fig. S2** (A) XPS wide scan survey spectrum of AgNCs-DNA2. (B) High-resolution XPS spectrum of Ag 3d<sub>5/2</sub> and Ag 3d<sub>3/2</sub> of AgNCs-DNA2.

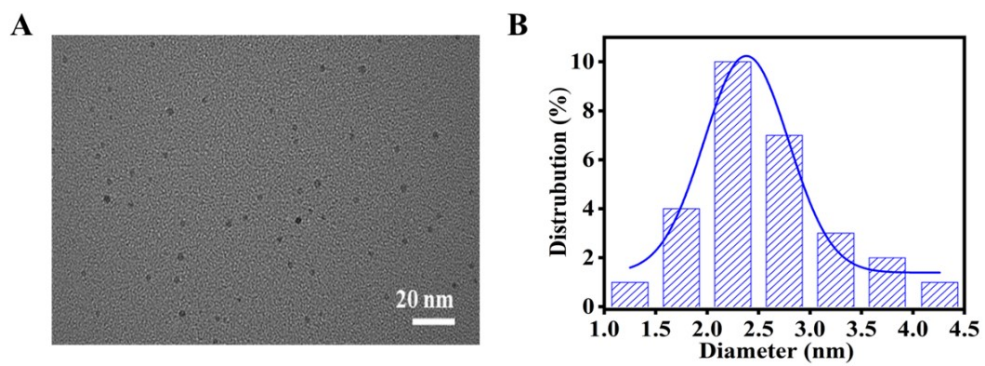

**Fig. S3** (A) TEM image and (B) particle size distribution histogram of AgNCs-DNA2.



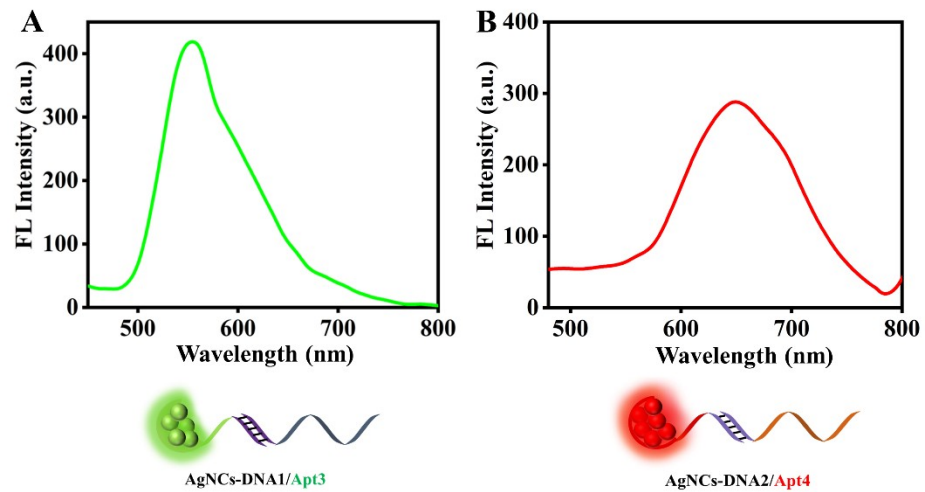

**Fig. S4** The fluorescence spectra of (A) AgNCs-DNA1/Apt3 and (B) AgNCs-DNA1/Apt4.

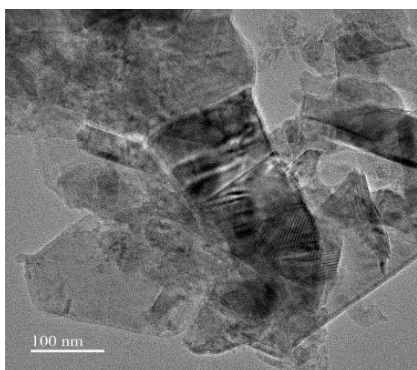

**Fig. S5** TEM image of MoS<sub>2</sub> nanosheets.

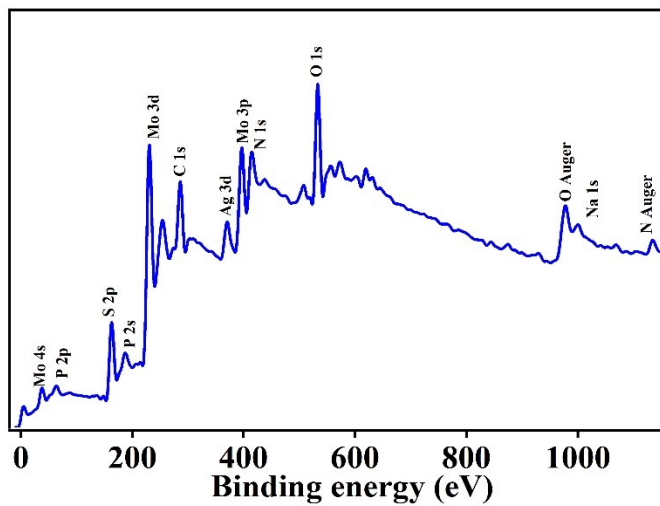

**Fig. S6** The wide scan XPS of MoS<sub>2</sub>@AgNCs-DNA/Apt bioconjugates.

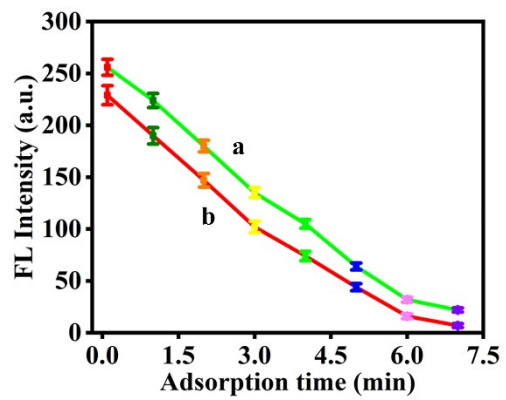

**Fig. S7** Effect of the adsorption time between (a) AgNCs-DNA1/Apt1 or (b) AgNCs-DNA2/Apt2 and MoS<sub>2</sub> nanosheets.

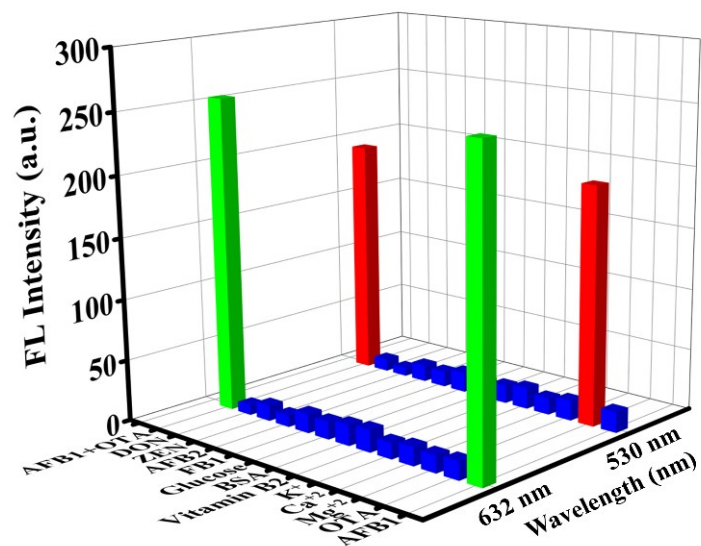

**Fig. S8** Selectivity of the aptasensor toward the detection of AFB1 and OTA with other interfering substances at a fixed concentration of 100 ng mL<sup>-1</sup>.

**Table S1** The information of DNA sequences used in this work.

| No.  | Sequence Information (from 5' to 3')                                          | References |
|------|-------------------------------------------------------------------------------|------------|
| DNA1 | TAT ATG TCC CCC CCC CAT ATA TA <u>GGGGG</u>                                   | 2          |
| DNA2 | ATATAGGCTACCCCCCCCCCCTAGCCTGTGC <u>GGGGG</u>                                  | 3          |
| Apt1 | GTT GGG CAC GTG TTGTCT CTC TGT GTC TCG TGC CCT<br>TCG CTA GG CCC <u>CCCCC</u> | 4          |
| Apt2 | GAT CGG GTG TGG GTG GCG TAA AGG GAG CAT CGG ACA<br><u>CCCCC</u>               | 5          |
| Apt3 | ATT AAA GCT CGC CAT CAA ATAC <u>CCCCC</u>                                     | 6          |
| Apt4 | ATACCAGCTTATTCAATT <u>CCCCC</u>                                               | 7          |

**Table S2** Comparison between our method and other fluorescence aptasensors for AFB1/OTA detection.

| Signal probe                       | Linear range (ng mL <sup>-1</sup> ) |            | LOD (pg mL <sup>-1</sup> ) |     | References |
|------------------------------------|-------------------------------------|------------|----------------------------|-----|------------|
|                                    | AFB1                                | OTA        | AFB1                       | OTA |            |
| AgNCs-DNA                          | –                                   | 0.01–0.30  | –                          | 2   | 5          |
| Au nanorods-DNA                    | –                                   | 0.01–10    | –                          | 5   | 8          |
| AgNCs-DNA                          | 0.001–0.05                          | 0.001–0.05 | 0.3                        | 0.2 | 9          |
| AuNCs-DNA                          | 0.005–100                           | –          | 3.4                        | –   | 4          |
| Carbon dots/CdZnTe<br>quantum dots | 0.01–10                             | 0.02–5.0   | 3.3                        | 7.1 | 10         |
| AgNCs-DNA                          | 0.1–120                             | 0.1-100    | 1.2                        | 3.1 | This work  |

**Table S3** Simultaneous detection of AFB1 and OTA in spiked peanut samples (n = 3).

| Samples          | Added (ng mL <sup>-1</sup> ) | Found (ng mL <sup>-1</sup> ) | Recovery (%) | RSD (%) |
|------------------|------------------------------|------------------------------|--------------|---------|
| AFB <sub>1</sub> | 0.50                         | 0.503                        | 100.6        | 5.2     |
|                  | 1.0                          | 0.997                        | 99.7         | 9.7     |
|                  | 5.0                          | 4.890                        | 97.8         | 9.8     |
| OTA              | 0.5                          | 0.487                        | 97.4         | 8.2     |
|                  | 1.0                          | 1.067                        | 106.7        | 6.8     |
|                  | 5.0                          | 4.934                        | 98.68        | 7.8     |



## Notes and references

- 1 B. L. Li, H. L. Zou, L. Lu, Y. Yang, J. L. Lei, H. Q. Luo, and N. B. Li, *Adv. Funct. Mater.*, 2015, **25**, 3541–3550.
- 2 J. Li, Y. Dai, S. Wang, C. Han, and K. Xu, *Sens. Actuators B Chem.*, 2016, **232**, 1–8.
- 3 J. T. Del Bonis-O'Donnell, A. Thakrar, J. W. Hirschberg, D. Vong, B. N. Queenan, D. K. Fygenon, and S. Pennathur, *ACS Chem. Neurosci.*, 2018, **9**, 849–857.
- 4 I. M. Khan, S. Niazi, Y. Yu, A. Mohsin, B. S. Mushtaq, M. W. Iqbal, A. Rehman, W. Akhtar, and Z. Wang, *Anal. Chem.*, 2019, **91**, 14085–14092.
- 5 J. Chen, X. Zhang, S. Cai, D. Wu, M. Chen, S. Wang, and J. Zhang, *Biosens. Bioelectron.*, 2014, **57**, 226–231.
- 6 B. Kavosi, A. Salimi, R. Hallaj, F. Moradi, *Biosens. Bioelectron.*, 2015, **74**, 915–923.
- 7 W. Xiang, Q. Lv, H. Shi, B. Xie, L. Gao, *Talanta*, 2020, **214**, 120716.
- 8 L. Hao, M. Li, K. Peng, T. Ye, X. Wu, M. Yuan, H. Cao, F. Yin, H. Gu, and F. Xu, *J. Agric. Food Chem.*, 2022, **70**, 10662–10668.
- 9 J. Zhang, Y. K. Xia, M. Chen, D. Z. Wu, S. X. Cai, M. M. Liu, W. H. He, and Chen, J. H. *Sens. Actuators B Chem.*, 2016, **235**, 79–85.
- 10 J. Qian, H. Cui, X. Lu, C. Wang, K. An, N. Hao, and K. Wang, *Chem. Eng. J.*, 2020, **401**, 126017.
